# Supplementary material
Source: PubMed Central journal article supplement (PMC4885916)

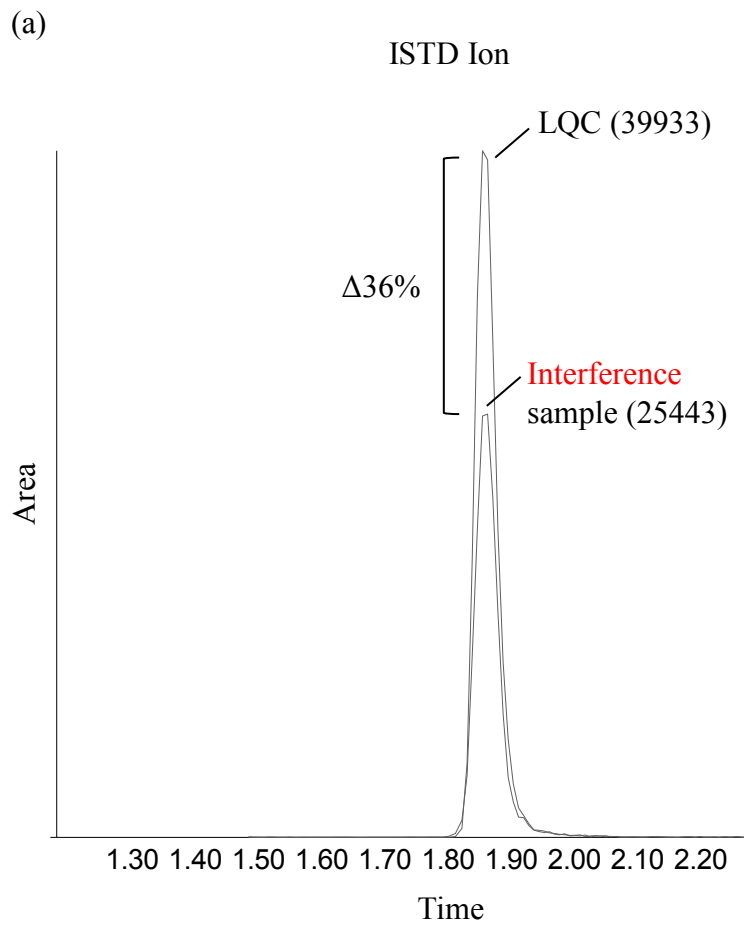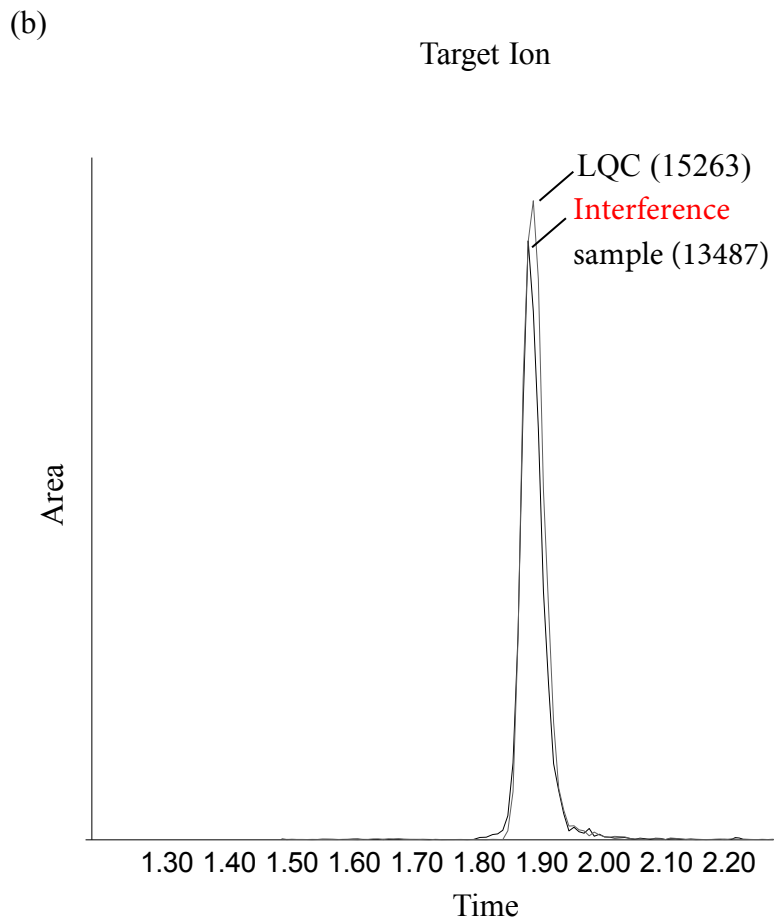

Supplement: supp_bkv140_bkv140supp_fig1.pdf [file supp_bkv140_bkv140supp_fig1.pdf]
